# Supplementary material for: Mutations in CEP120 cause Joubert syndrome as well as complex ciliopathy phenotypes
Source: PubMed Central journal article supplement (PMC5013089; doi:10.1136/jmedgenet-2016-103832), 2016-05-06
Supplement: jmedgenet-2016-103832supp_table.pdf [file jmedgenet-2016-103832supp_table.pdf]

**Supplemental Table 1 – Predicted pathogenicity of identified *CEP120* variants**

|                    | <b>SIFT</b> | <b>Polyphen-2</b> | <b>Provean</b>         | <b>MutationAssessor</b> | <b>dbSNP</b>                | <b>EVS</b>                       | <b>ExAC</b>          |
|--------------------|-------------|-------------------|------------------------|-------------------------|-----------------------------|----------------------------------|----------------------|
| <b>p.Val194Ala</b> | 0           | 0,999             | Deleterious<br>(-2.98) | M (2.32)                | no                          | no                               | no                   |
| <b>p.Ala199Pro</b> | 0           | 1                 | Deleterious<br>(-3.40) | M (2.36)                | rs367600930                 | 0.024/0.0/0.0162<br>(no hom)     | 0.0041%<br>(no hom)  |
| <b>p.Leu712Phe</b> | 0,1*        | 0,997             | Deleterious<br>(-3.37) | M (2.48)                | rs114280473<br>(MAF 0.0018) | 0.4302/0.1362/0.3306<br>(no hom) | 0.003547<br>(no hom) |
| <b>p.Leu726Pro</b> | 0           | 0,999             | Deleterious<br>(-5.11) | M (2.46)                | no                          | No                               | no                   |
| <b>p.Ile975Ser</b> | 0           | 0,998             | Deleterious<br>(-4.28) | L (1.89)                | no                          | No                               | no                   |

Legend: MAF: minor allele frequency; hom: homozygotes. Range and pathogenicity scores for each software are as follows: SIFT: range 0-1 (deleterious  $\leq 0.05$ ; tolerated  $> 0.05$ ); PolyPhen-2: range 0-1 (probably damaging  $\geq 0.957$ ; possibly damaging  $0.453 \geq \text{score} \leq 0.957$ ; benign  $\leq 0.453$ ); Provean: range -13 - +4 (deleterious  $\leq -2.5$ ; neutral  $> -2.5$ ); Mutation Assessor: range -5.76 - +5.37 (neutral  $< 0.6$ ; low impact  $0.6 \geq \text{score} < 2.0$ , medium impact  $2.0 \geq \text{score} < 3.7$ , high impact  $\geq 3.7$ ).
